# Supplementary material for: Regulation of Airway Inflammation by G-protein Regulatory Motif Peptides of AGS3 protein
Source: PubMed Central journal article supplement (PMC4895231; doi:10.1038/srep27054), 2016-06-07
Supplement: srep27054-s1.pdf [file srep27054-s1.pdf]

## Supplemental Figures

### Regulation of Airway Inflammation by G-protein Regulatory Motif Peptides of AGS3 protein

IL-Whan Choi<sup>1</sup>, Do Whan Ahn<sup>2</sup>, Jang-Kyu Choi<sup>2</sup>, Hee-Jae Cha<sup>3,4</sup>, Mee Sun Ock<sup>3</sup>, EunAe You<sup>5</sup>, SangMyung Rhee<sup>5</sup>, Kwang Chul Kim<sup>6</sup>, Yung Hyun Choi<sup>7,8</sup>, & Kyoung Seob Song<sup>2,4,8</sup>

\*Short title: Effect of the GPR motif on airway inflammation

<sup>1</sup>Department of Microbiology, Inje University College of Medicine, Busan, Korea;

<sup>2</sup>Department of Physiology, Kosin University College of Medicine, Busan, Korea;

<sup>3</sup>Department of Parasitology and Genetics, Kosin University College of Medicine, Busan, Korea;

<sup>4</sup>Institute of Medicine, Kosin University College of Medicine, Busan, Korea;

<sup>5</sup>Department of Life Science, Chung-Ang University, Seoul, Korea;

<sup>6</sup>Department of Otolaryngology-Head and Neck Surgery, University of Arizona College of Medicine, Tucson, AZ, USA.

<sup>7</sup>Department of Biochemistry, College of Korean Medicine, Don-Eui University, Busan, Korea;

<sup>8</sup>These authors are contributed equally.

To whom correspondence should be addressed:

Yung Hyun Choi, Department of Biochemistry, College of Oriental Medicine, Don-Eui University, Busan, Korea. Tel: +82-51-850-7413; Fax: +82-51-853-4036; E-mail: [choiyh@deu.ac.kr](mailto:choiyh@deu.ac.kr)

Kyoung Seob Song, Department of Physiology, Kosin University College of Medicine, 34 Amnam-dong, Seo-gu, Busan 602-703, Korea, Tel.: +82-51-990-6236; Fax.: +82-51-990-3081; E-mail: [kssong@kosin.ac.kr](mailto:kssong@kosin.ac.kr)

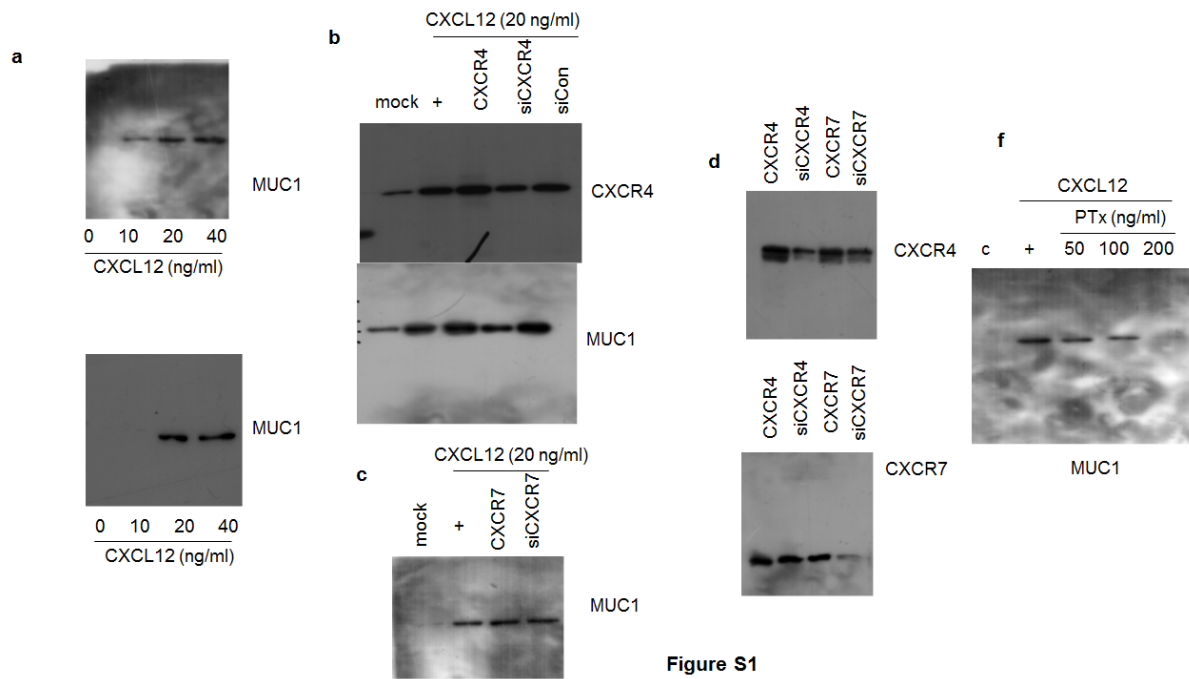

**Figure S1**

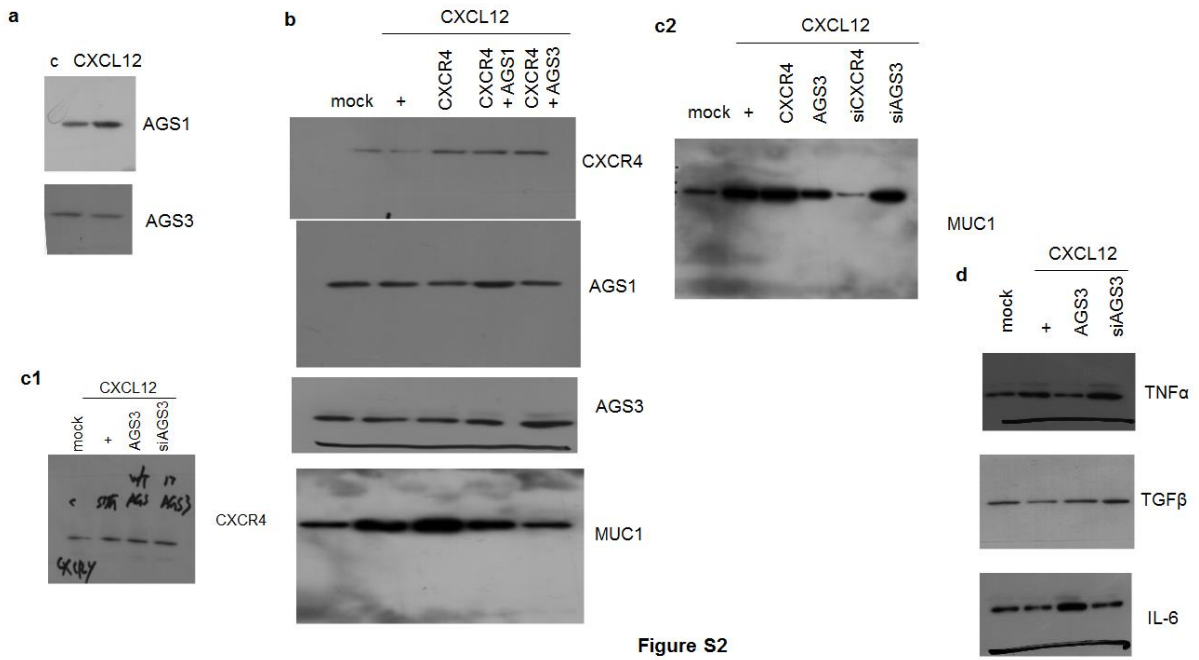

Figure S2

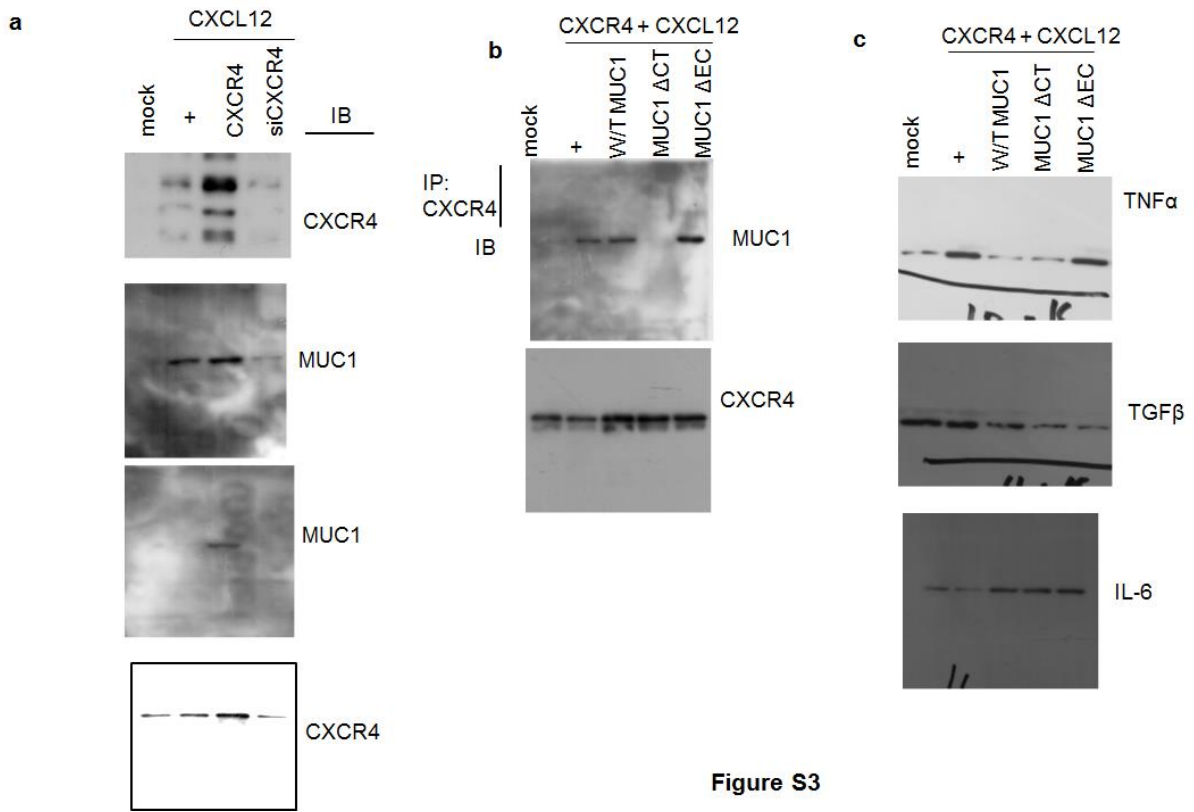

**Figure S3**

**a**

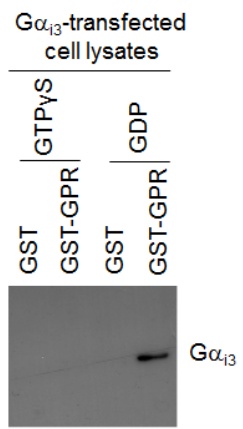

**b**

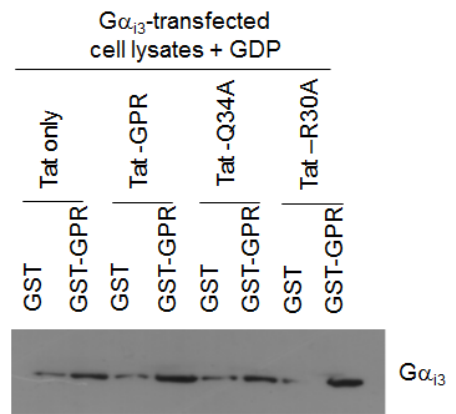

**Figure S4**

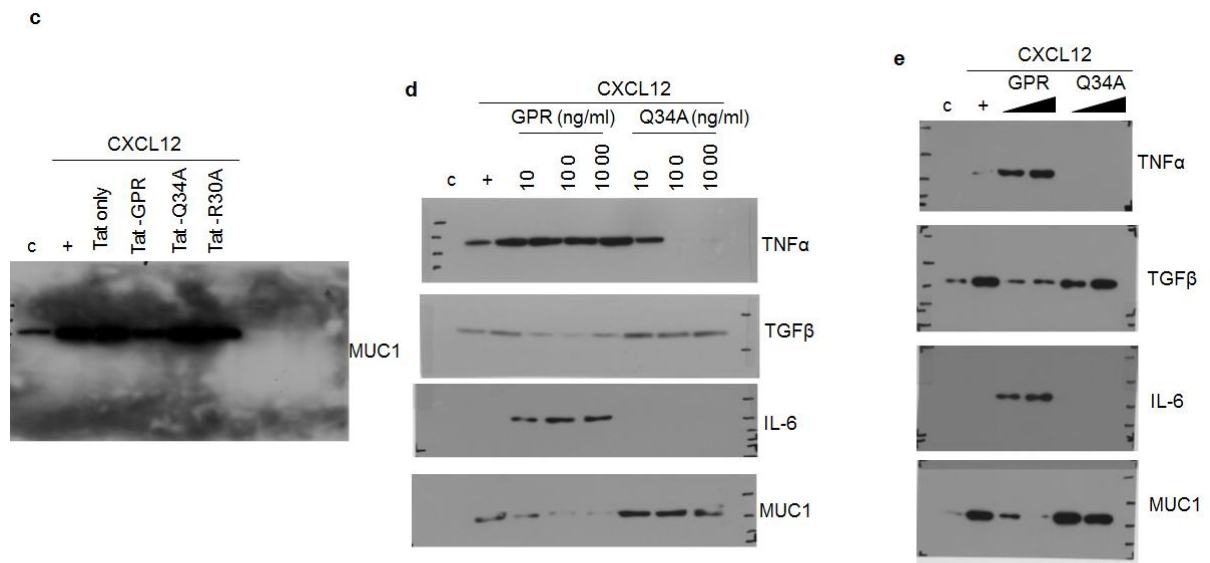

**Figure S4**

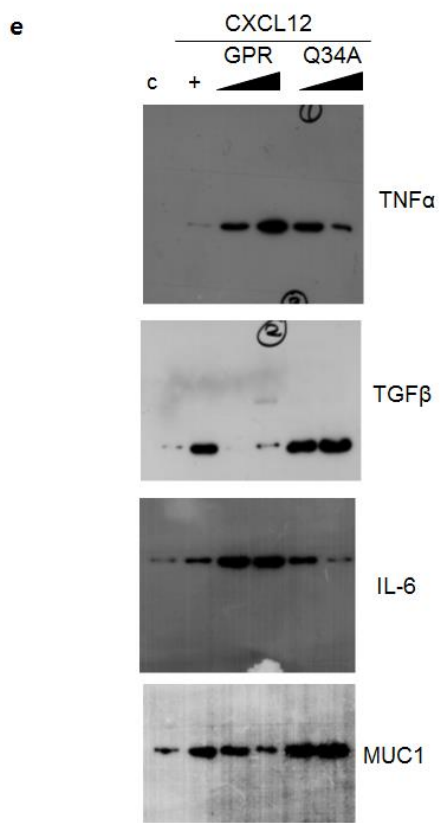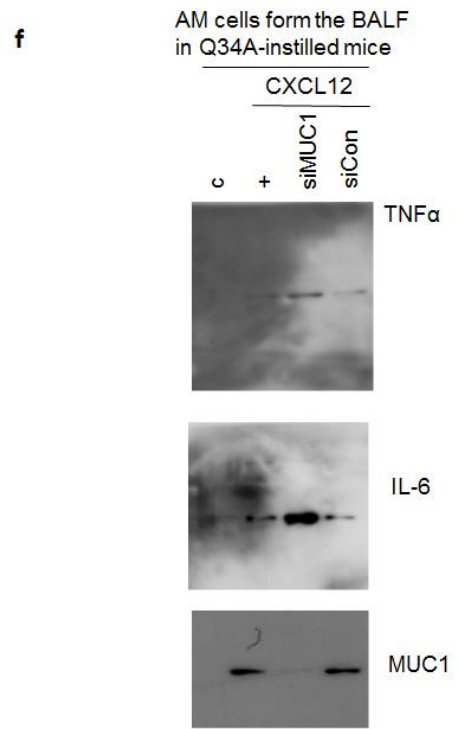

**Figure S6**
